# Supplementary material for: Online measurements of cycloalkanes based on NO + chemical ionization in proton transfer reaction time-of-flight mass spectrometry (PTR-ToF-MS)
Source: Copernicus journal article supplement (doi:10.5194/amt-15-6935-2022), 2022-12-02
Supplement: Supplementary file 1 [file amt-15-6935-2022-supplement.pdf]

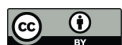

*Supplement of*

## **Online measurements of cycloalkanes based on NO<sup>+</sup> chemical ionization in proton transfer reaction time-of-flight mass spectrometry (PTR-ToF-MS)**

**Yubin Chen et al.**

*Correspondence to:* Bin Yuan (byuan@jnu.edu.cn)

The copyright of individual parts of the supplement might differ from the article licence.

---

## 15 Normalization the measurement data of NO<sup>+</sup> PTR-ToF-MS

16 Here we normalize the raw data measured by NO<sup>+</sup> PTR-ToF-MS in the following  
17 way:

$$18 \quad i[RH^+]_{norm} = \frac{i[RH^+]}{i[NO^+]} \times 10^6 \quad (S1)$$

19 In this equation,  $i[RH^+]_{norm}$  represents the signal value of normalized  
20 measurement data (ncps),  $i[RH^+]$  represents the signal value of original measurement  
21 data (cps), and  $i[NO^+]$  represents the ion abundance of NO<sup>+</sup> ions. The  $i[NO^+]$  is  
22 calculated from the ratio between <sup>14</sup>N and its isotopes <sup>15</sup>N, which is defined at 277 in  
23 this study.

## 24 Calculation method of instrument detection limit

25 The detection limit is the minimum concentration of the compounds that can be  
26 detected by the instrument and is related to the response factor, integration time,  
27 background signal and signal-to-noise ratio of the compounds to be tested. Assuming  
28 that both the statistical characteristic of the signal and the random error (noise) conform  
29 to the Poisson distribution, then according to the error transfer formula, the signal-to-  
30 noise ratio can be expressed as:

$$31 \quad \frac{S}{N} = \frac{C_f [X] t}{\sqrt{C_f [X] t + 2 B t}} \quad (S2)$$

32 where B represents the background signal,  $C_f$  is the calibration response factor, [X]  
33 represents the detection limit, and  $t$  is the integration time. The detection limit of  
34 cycloalkanes measured by NO<sup>+</sup> PTR-ToF-MS are calculated as the concentrations at  
35 which signal counts are 3 times the SD of measured background counts (Bertram et al.,  
36 2011; Wang et al., 2020; Yuan et al., 2017).  
37

38 **Table S1.** Detailed information of the customized cylinder gas standard used in this  
 39 study.

| <b>Standard Compound</b>           | <b>Formula</b>                  | <b>CAS#</b> | <b>Concentration<br/>(ppb)</b> | <b>Uncertainty</b> |
|------------------------------------|---------------------------------|-------------|--------------------------------|--------------------|
| Toluene                            | C <sub>7</sub> H <sub>8</sub>   | 108-88-3    | 101.7                          | ±5%                |
| Methacrolein                       | C <sub>4</sub> H <sub>6</sub> O | 78-85-3     | 103.7                          | ±5%                |
| 1,1,3,5-<br>Tetramethylcyclohexane | C <sub>10</sub> H <sub>20</sub> | 4306-65-4   | 100.5                          | ±5%                |
| Pentylcyclohexane                  | C <sub>11</sub> H <sub>22</sub> | 4292-92-6   | 95.9                           | ±5%                |
| Hexylcyclohexane                   | C <sub>12</sub> H <sub>24</sub> | 4292-75-5   | 96.0                           | ±5%                |
| Heptylcyclohexane                  | C <sub>13</sub> H <sub>26</sub> | 5617-41-4   | 100.0                          | ±5%                |
| Octylcyclohexane                   | C <sub>14</sub> H <sub>28</sub> | 1795-15-9   | 74.6                           | ±5%                |
| Octane                             | C <sub>8</sub> H <sub>18</sub>  | 111-65-9    | 100.8                          | ±5%                |
| Nonane                             | C <sub>9</sub> H <sub>20</sub>  | 111-84-2    | 100.1                          | ±5%                |
| Decane                             | C <sub>10</sub> H <sub>22</sub> | 124-18-5    | 100.7                          | ±5%                |
| Undecane                           | C <sub>11</sub> H <sub>24</sub> | 1120-21-4   | 97.4                           | ±5%                |
| Dodecane                           | C <sub>12</sub> H <sub>26</sub> | 112-40-3    | 98.2                           | ±5%                |
| Tridecane                          | C <sub>13</sub> H <sub>28</sub> | 629-50-5    | 99.4                           | ±5%                |
| Tetradecane                        | C <sub>14</sub> H <sub>30</sub> | 629-59-4    | 96.0                           | ±5%                |
| Penadecane                         | C <sub>15</sub> H <sub>32</sub> | 629-62-9    | 27.9                           | ±5%                |

40  
 41

42 **Table S2.** Detailed information of the measurement location and technique used for  
 43 detection of cycloalkanes in this study and previous studies.

| Measurement location         | Measuring technique                                                                                 | Reference              |
|------------------------------|-----------------------------------------------------------------------------------------------------|------------------------|
| Guangzhou, China             | NO <sup>+</sup> PTR-ToF-MS                                                                          | This work              |
| Algiers, Algeria             | High-resolution gas chromatography-mass spectrometry (GC-MS) <sup>a</sup>                           | (Yassaa et al., 2001)  |
| Los Angeles, USA             | A two-channel in situ gas chromatography-mass spectrometry (GC-MS/FID) <sup>a</sup>                 | (de Gouw et al., 2017) |
| London, UK                   | Two-dimensional gas-chromatography time-of flight mass- spectrometry (TD-GC×GC ToF-MS) <sup>b</sup> | (Xu et al., 2020)      |
| Northeastern Colorado, USA   | GC-MS/FID <sup>a</sup>                                                                              | (Gilman et al., 2013)  |
| Lubricating oils             | TD-GC×GC ToF-MS <sup>b</sup>                                                                        | (Liang et al., 2018)   |
| Diesel exhausts              | TD-GC×GC ToF-MS <sup>b</sup>                                                                        | (Alam et al., 2016)    |
| Gasoline and diesel exhausts | GC-MS <sup>c</sup>                                                                                  | (Gentner et al., 2012) |
| Gasoline and diesel exhausts | NO <sup>+</sup> PTR-ToF-MS                                                                          | This work              |

44 <sup>a</sup> The reported acyclic and cyclic alkanes were identified and quantified with gas  
 45 standards

46 <sup>b</sup> The total ions signals of species is integrated into different regions (bin) according to  
 47 the residence time of *n*-alkanes. The total ions signals of each bin were considered as  
 48 the signals of acyclic and cyclic alkanes.

49 <sup>c</sup> The total ions signals of acyclic and cyclic alkanes were calculated by subtracted the  
 50 signals of known compounds from similar chemical classes, and the remaining signals  
 51 were considered to be the signals of acyclic and cyclic alkanes.

52

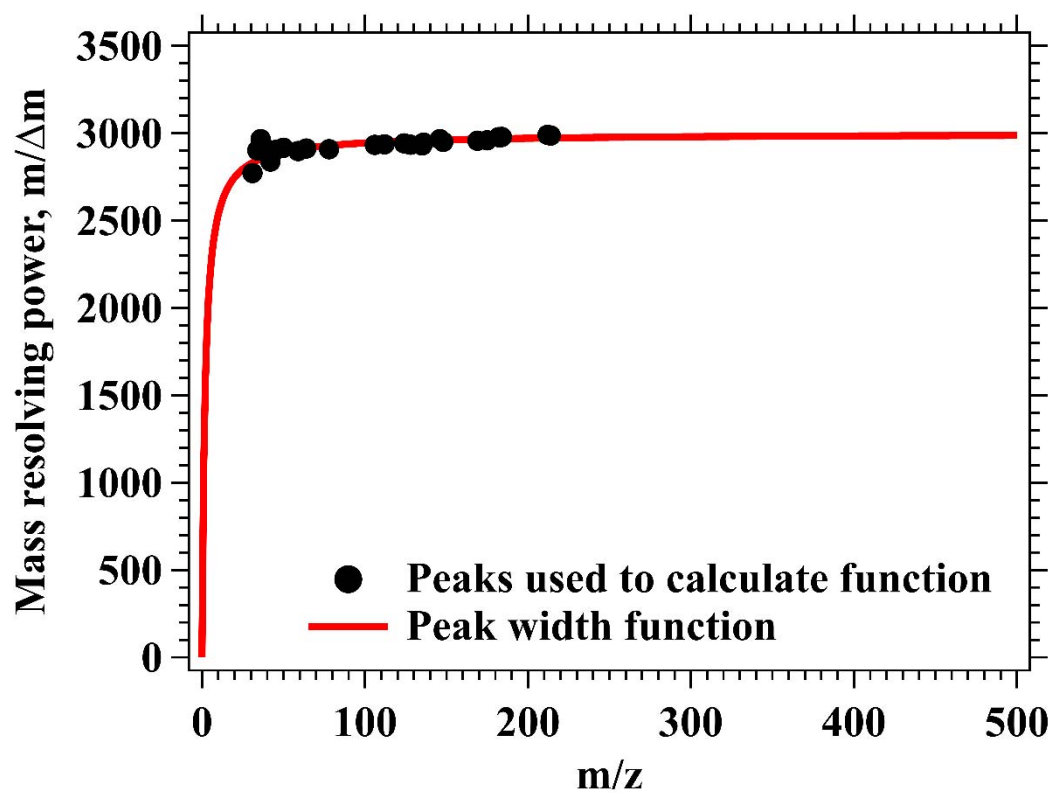

54

55 **Figure S1.** The relationship between mass resolving power and  $m/z$ .

56

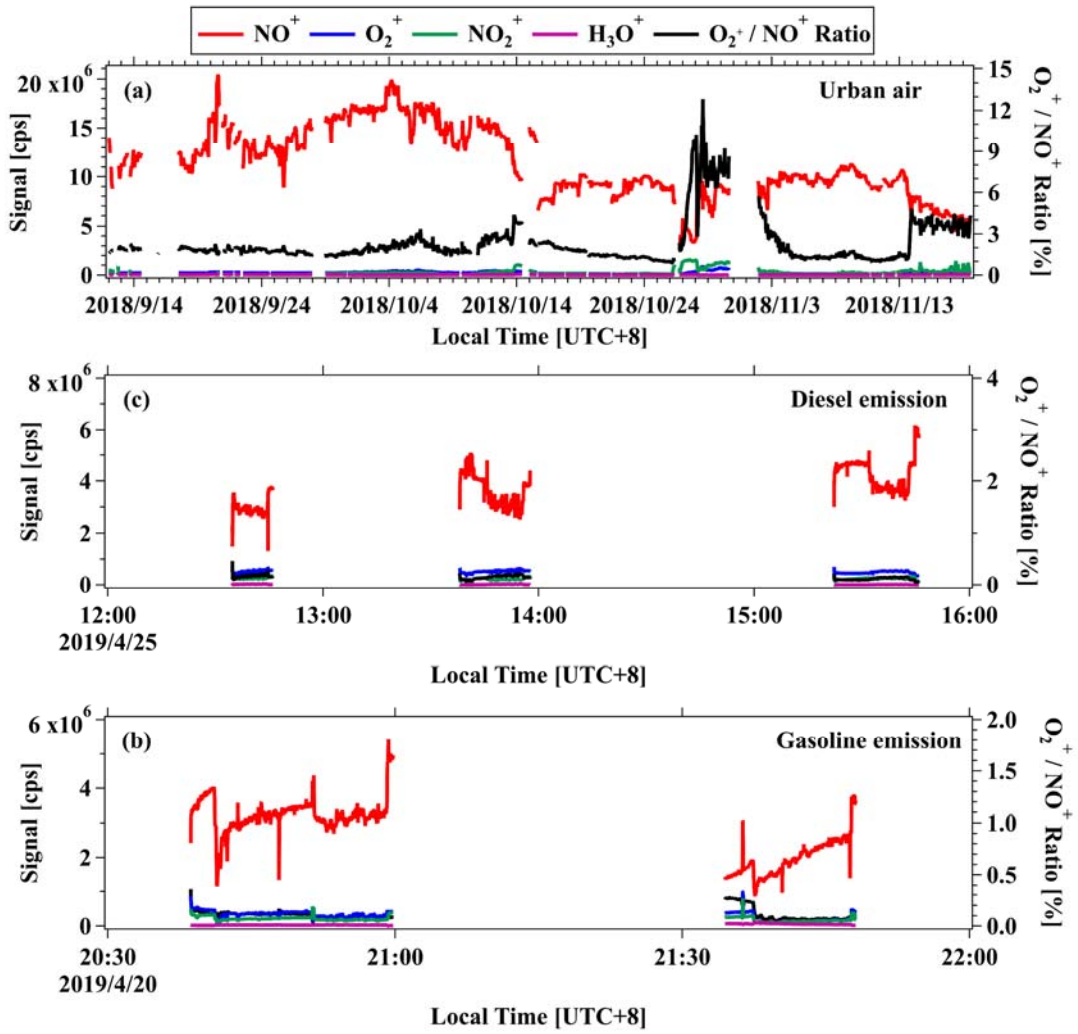

57

58 **Figure S2.** Time series of  $NO^+$ ,  $O_2^+$ ,  $NO_2^+$ , and  $H_3O^+$  and the ratio of  $O_2^+$  to  $NO^+$  during

59 the measurement of urban air **(a)** and vehicular emissions **(b-c)**.

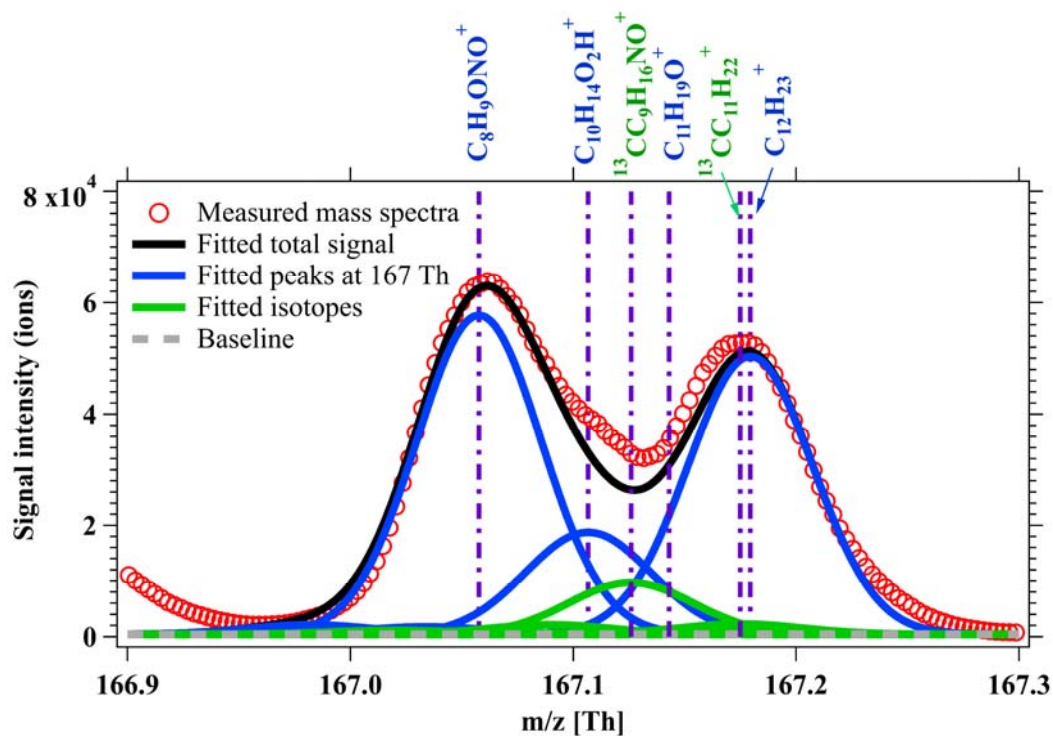

61

62 **Figure S3.** High-resolution peak fitting to the averaged mass spectra on a typical day  
63 (6 October 2018) for  $m/z$  167 to individual ion peaks of  $C_{12}$  cycloalkanes ( $C_{12}H_{23}^+$ ),  
64 other isomeric ions ( $C_8H_9ONO^+$ ,  $C_{10}H_{14}O_2H^+$ , and  $C_{11}H_{19}O^+$ ), and isotopes of other ion  
65 ( $^{13}C_9H_{16}NO^+$  and  $^{13}C_{11}H_{22}^+$ ) detected from  $NO^+$  PTR-ToF-MS.

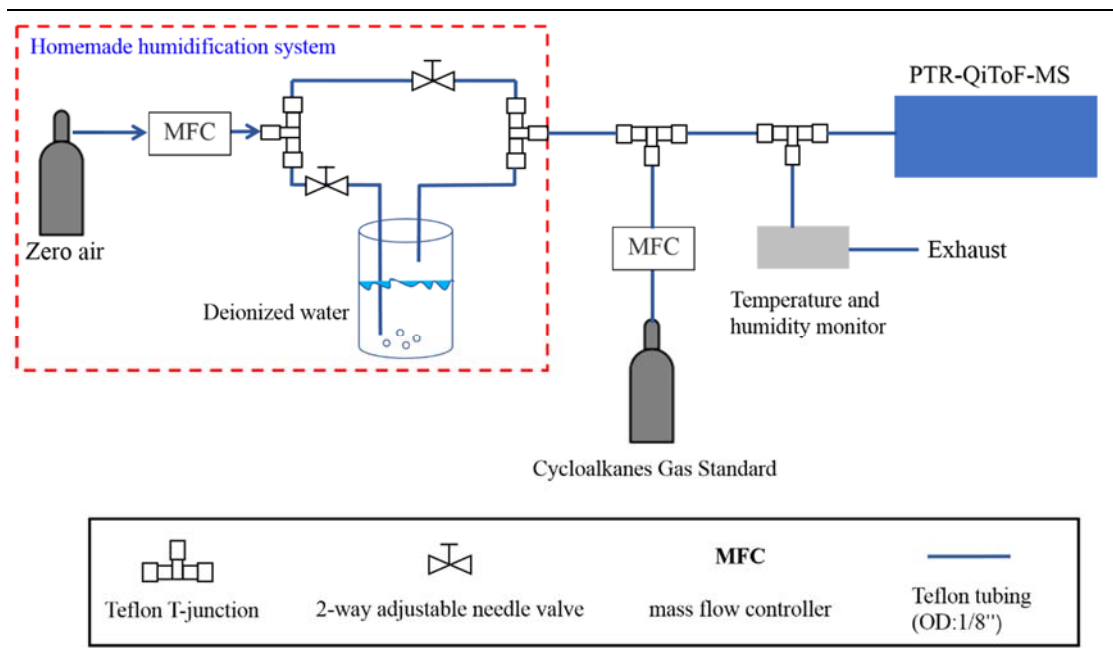

66  
67  
68

**Figure S4.** Schematic drawing of the custom-built humidity delivery system.



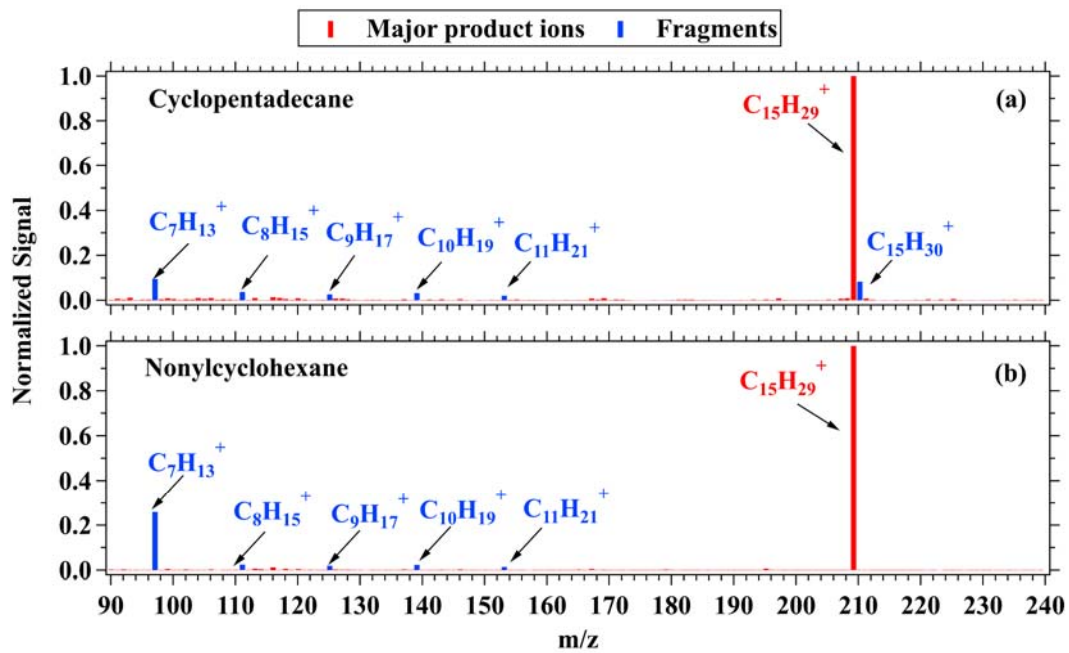

69

70 **Figure S5.** Mass spectra of product ions from cyclopentadecane (a) and

71 nonylcyclohexane (b) in  $\text{NO}^+$  PTR-ToF-MS. The major product ions are shown in red,

72 and the fragments are shown in blue.

73

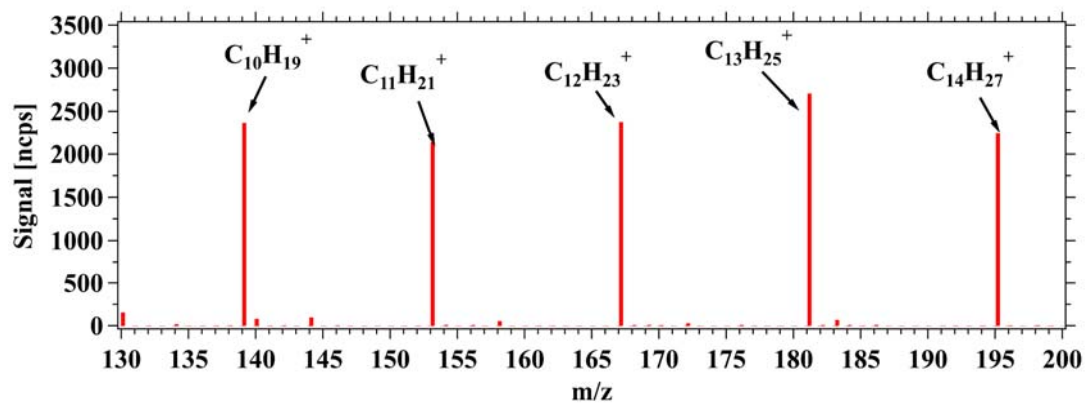

74

75 **Figure S6.** Mass spectra of product ions from  $C_{10}$ - $C_{14}$  alkyl-cyclohexanes in  $NO^+$  PTR-

76 ToF-MS during the calibration experiments.

77

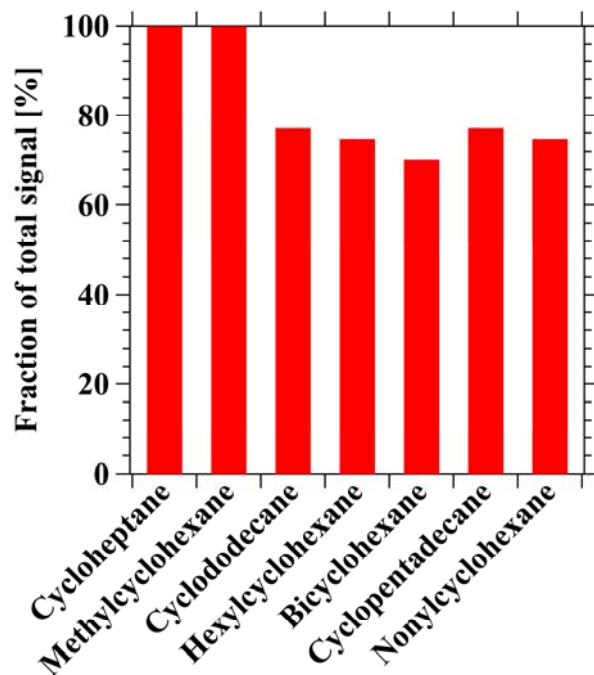

78

79 **Figure S7.** The fractions of product ions (M-H) from hydride abstraction of C<sub>7</sub>, C<sub>12</sub>,

80 and C<sub>15</sub> cyclic alkanes and C<sub>12</sub> bicyclic alkanes in NO<sup>+</sup> PTR-ToF-MS.

81

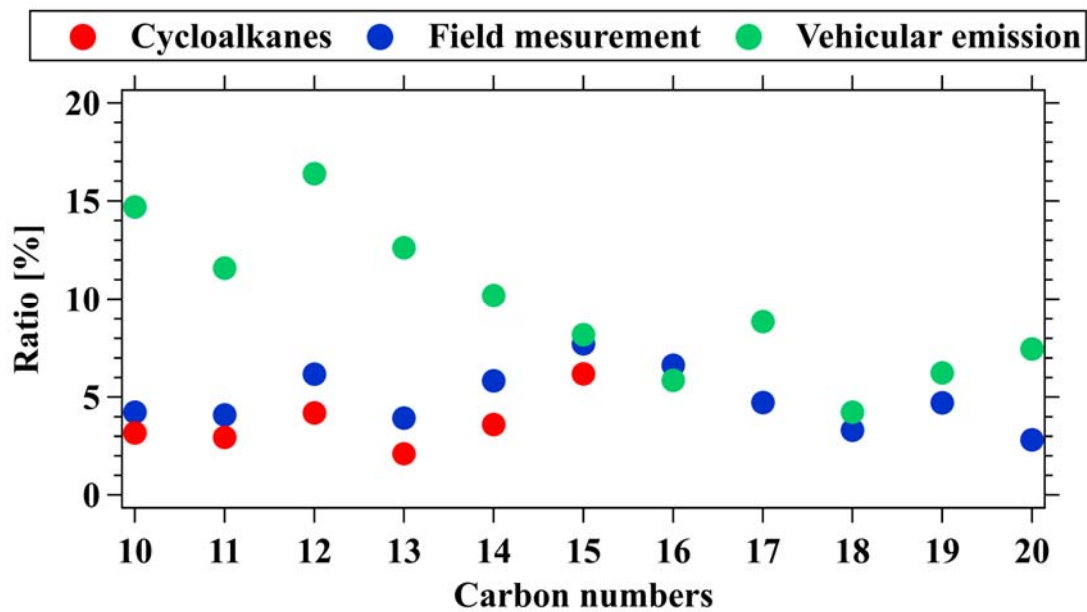

82

83 **Figure S8.** The ratios of  $C_nH_{2n}^+$  to  $C_nH_{2n-1}^+$  from cycloalkanes (red), field measurement

84 (blue) and vehicular emissions (green) measured by  $NO^+$  PTR-ToF-MS.

85

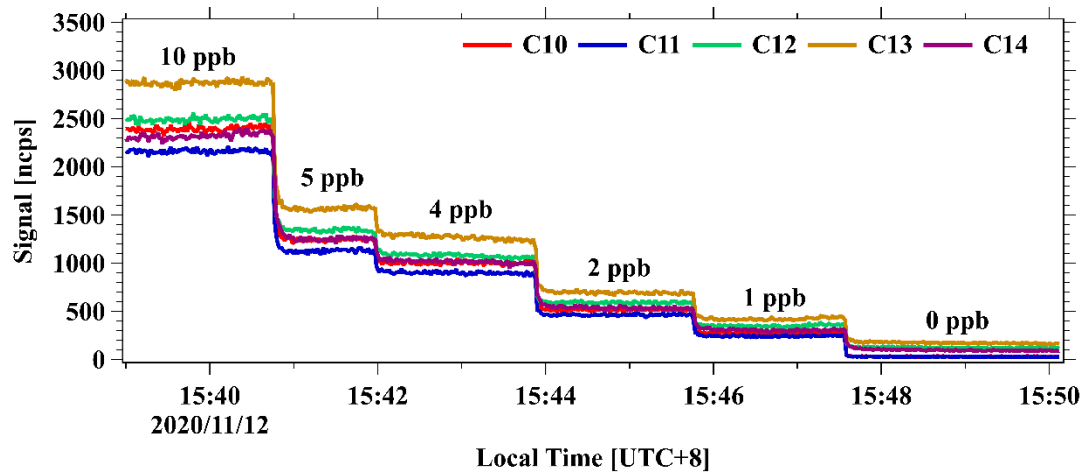

86

87 **Figure S9.** The multipoint calibrations of C<sub>10</sub>-C<sub>14</sub> cycloalkanes in dry condition (<1%

88 RH).

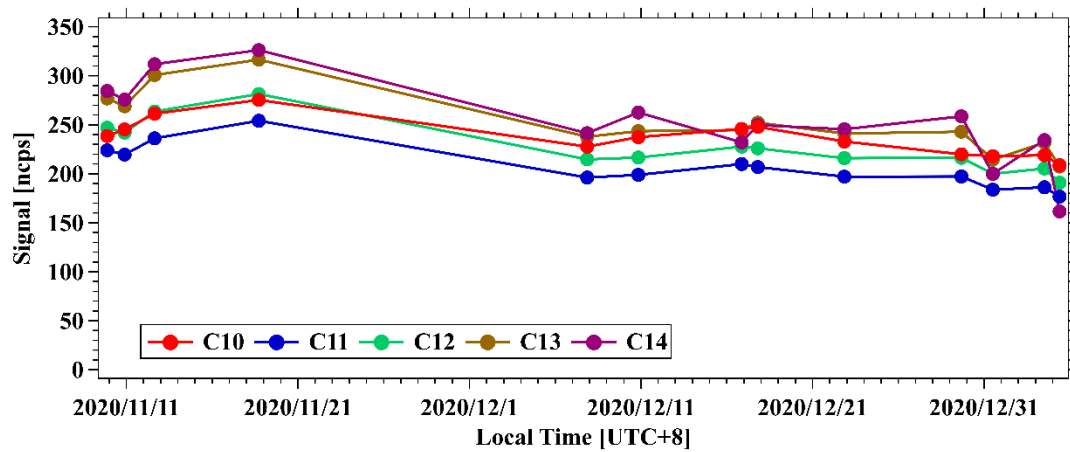

89

90 **Figure S10.** Calibration results of  $\text{NO}^+$  PTR-ToF-MS for  $\text{C}_{10}$ - $\text{C}_{14}$  cycloalkanes during  
91 the laboratory experiments.

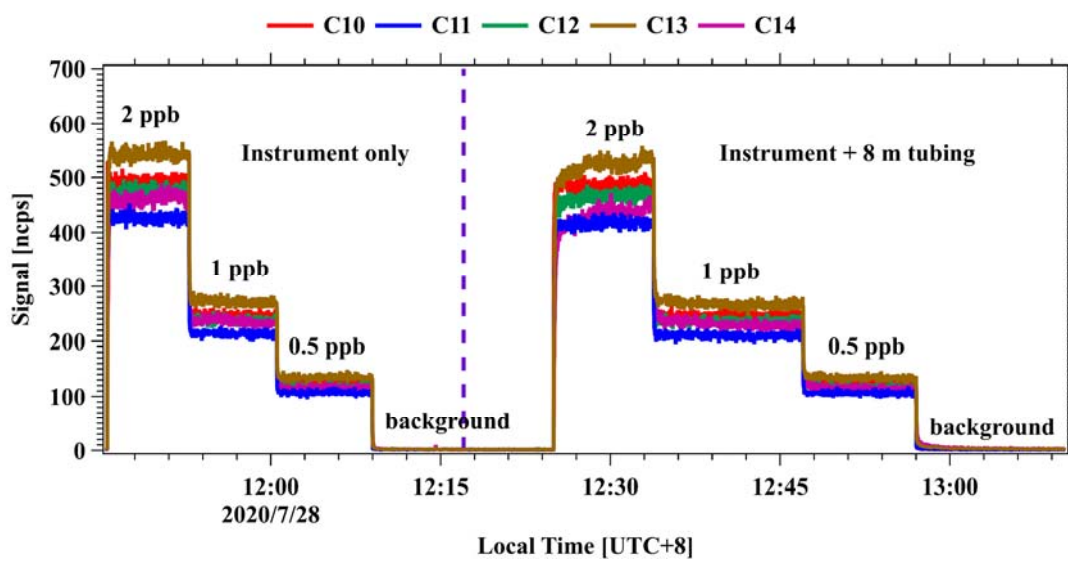

92

93 **Figure S11.** The tubing loss experiments of cycloalkanes (C<sub>10</sub>-C<sub>14</sub>) measured by NO<sup>+</sup>  
94 PTR-ToF-MS with an external pump at 5.0 L/min.

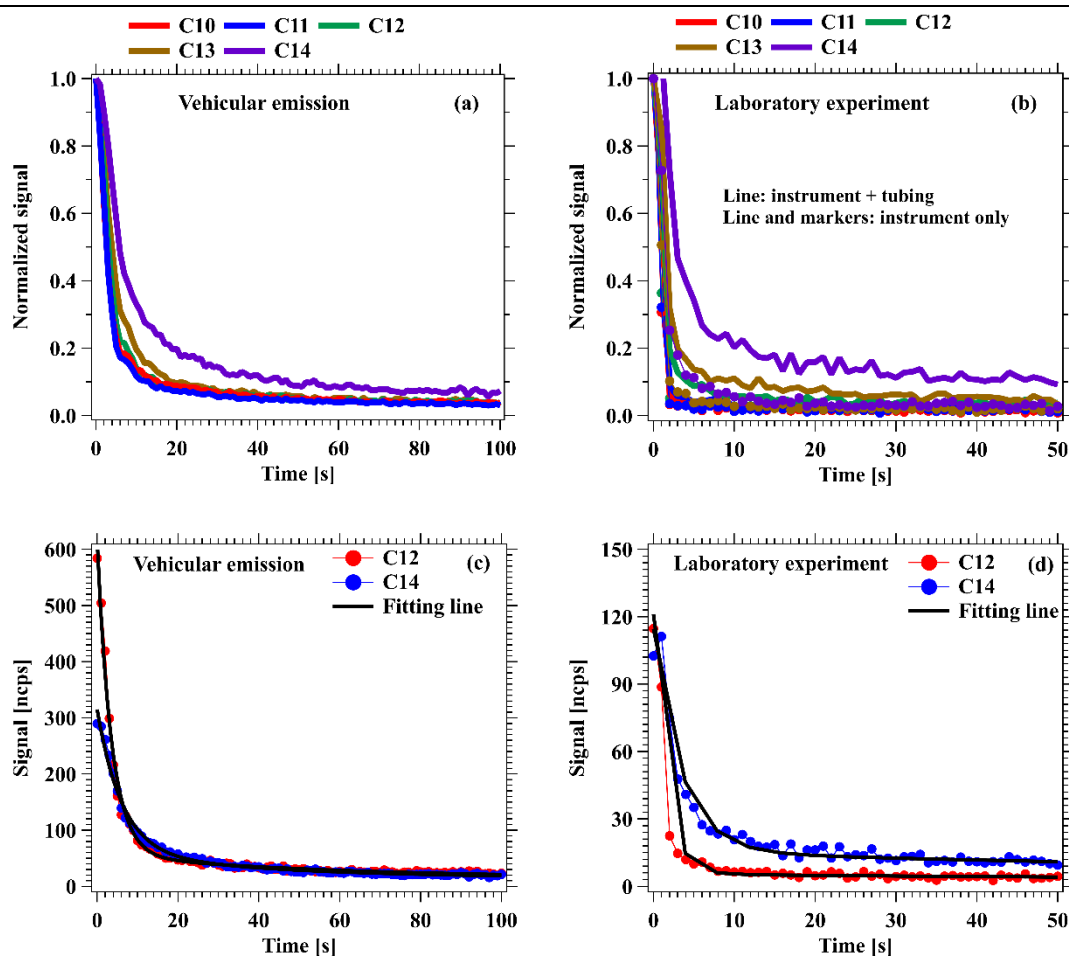

95

96 **Figure S12.** (a) The decrease in the normalized signal of cycloalkanes during the  
 97 vehicular emission measurement. (b) The decrease in the normalized signal of  
 98 cycloalkanes for instrument + tubing (line) and instrument only (line and markers)  
 99 during the laboratory experiments. (c-d) The decrease in the signal of C<sub>12</sub> and C<sub>14</sub>  
 100 cycloalkanes during the vehicular emission test and laboratory experiments,  
 101 respectively. The data are fitted by a hyperbolic equation.



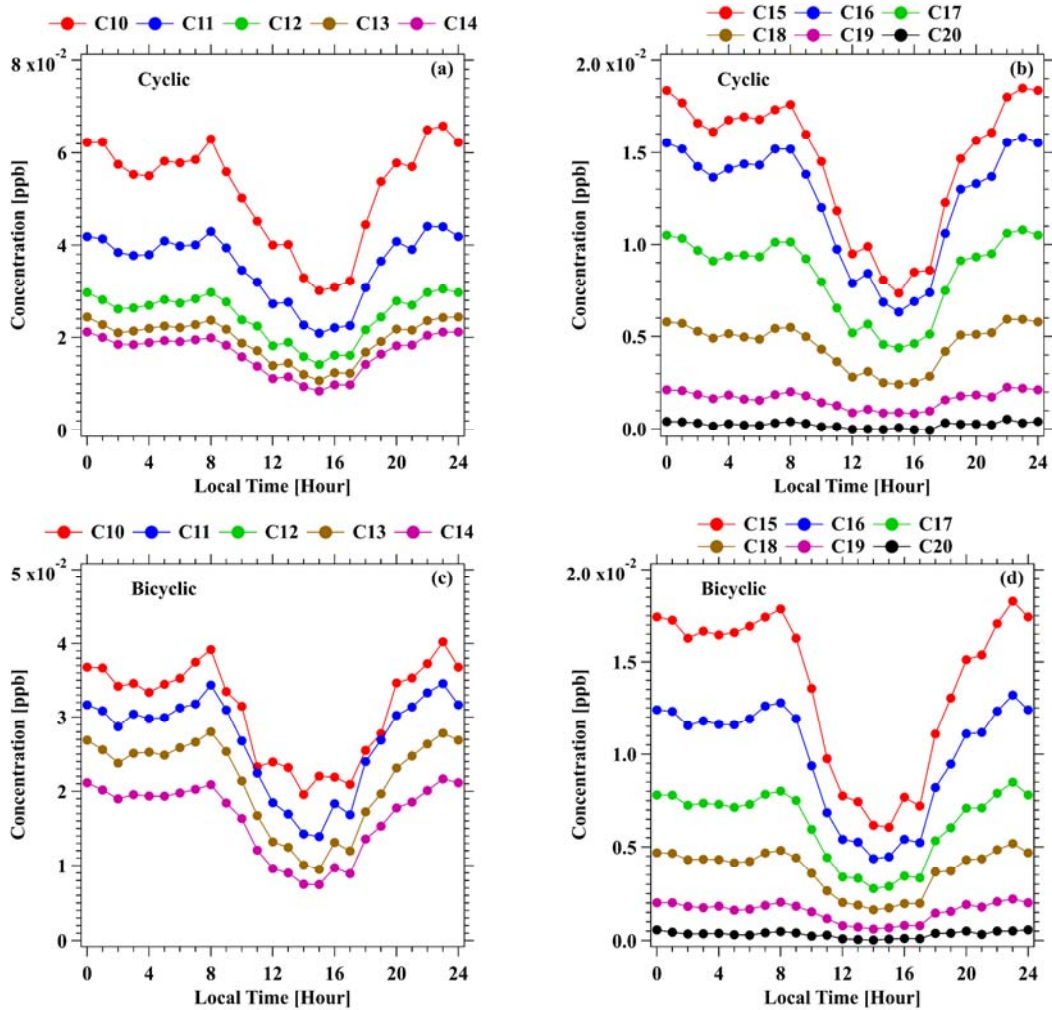

102

103 **Figure S13.** Diurnal variations of C<sub>10</sub>-C<sub>20</sub> cyclic and bicyclic alkanes during the  
 104 campaign in urban region.

---

105 **Reference**

- 106 Alam, M. S., Zeraati-Rezaei, S., Stark, C. P., Liang, Z., Xu, H., and Harrison, R. M.:  
107 The characterisation of diesel exhaust particles – composition, size distribution and  
108 partitioning, *Faraday Discussions*, 189, 69-84, 2016.
- 109 Bertram, T. H., Kimmel, J. R., Crisp, T. A., Ryder, O. S., Yatavelli, R. L. N., Thornton,  
110 J. A., Cubison, M. J., Gonin, M., and Worsnop, D. R.: A field-deployable, chemical  
111 ionization time-of-flight mass spectrometer, *Atmospheric Measurement Techniques*, 4,  
112 1471-1479, 2011.
- 113 de Gouw, J. A., Gilman, J. B., Kim, S. W., Lerner, B. M., Isaacman-VanWertz, G.,  
114 McDonald, B. C., Warneke, C., Kuster, W. C., Lefer, B. L., Griffith, S. M., Dusanter,  
115 S., Stevens, P. S., and Stutz, J.: Chemistry of Volatile Organic Compounds in the Los  
116 Angeles basin: Nighttime Removal of Alkenes and Determination of Emission Ratios,  
117 *Journal of Geophysical Research: Atmospheres*, 122, 11,843-811,861, 2017.
- 118 Gentner, D. R., Isaacman, G., Worton, D. R., Chan, A. W., Dallmann, T. R., Davis, L.,  
119 Liu, S., Day, D. A., Russell, L. M., Wilson, K. R., Weber, R., Guha, A., Harley, R. A.,  
120 and Goldstein, A. H.: Elucidating secondary organic aerosol from diesel and gasoline  
121 vehicles through detailed characterization of organic carbon emissions, *Proceedings of  
122 the National Academy of Sciences of the United States of America*, 109, 18318-18323,  
123 2012.
- 124 Gilman, J. B., Lerner, B. M., Kuster, W. C., and de Gouw, J. A.: Source Signature of  
125 Volatile Organic Compounds from Oil and Natural Gas Operations in Northeastern  
126 Colorado, *Environmental Science & Technology*, 47, 1297-1305, 2013.
- 127 Liang, Z., Chen, L., Alam, M. S., Zeraati Rezaei, S., Stark, C., Xu, H., and Harrison, R.  
128 M.: Comprehensive chemical characterization of lubricating oils used in modern  
129 vehicular engines utilizing GC × GC-TOFMS, *Fuel*, 220, 792-799, 2018.
- 130 Wang, C. M., Yuan, B., Wu, C. H., Wang, S. H., Qi, J. P., Wang, B. L., Wang, Z. L., Hu,  
131 W. W., Chen, W., Ye, C. S., Wang, W. J., Sun, Y. L., Wang, C., Huang, S., Song, W.,  
132 Wang, X. M., Yang, S. X., Zhang, S. Y., Xu, W. Y., Ma, N., Zhang, Z. Y., Jiang, B., Su,  
133 H., Cheng, Y. F., Wang, X. M., and Shao, M.: Measurements of higher alkanes using  
134 NO<sup>+</sup> chemical ionization in PTR-ToF-MS: important contributions of higher alkanes to  
135 secondary organic aerosols in China, *Atmospheric Chemistry and Physics*, 20, 14123-  
136 14138, 2020.
- 137 Xu, R., Alam, M. S., Stark, C., and Harrison, R. M.: Composition and emission factors  
138 of traffic- emitted intermediate volatility and semi-volatile hydrocarbons (C<sub>10</sub>–C<sub>36</sub>) at a  
139 street canyon and urban background sites in central London, UK, *Atmospheric  
140 Environment*, 231, 2020.
- 141 Yassaa, N., Meklati, B. Y., Brancaleoni, E., Frattoni, M., and Ciccioli, P.: Polar and non-  
142 polar volatile organic compounds (VOCs) in urban Algiers and saharian sites of Algeria,  
143 *Atmospheric Environment*, 35, 787-801, 2001.
- 144 Yuan, B., Koss, A. R., Warneke, C., Coggon, M., Sekimoto, K., and de Gouw, J. A.:

---

145 Proton-Transfer-Reaction Mass Spectrometry: Applications in Atmospheric Sciences,  
146 Chem Rev, 117, 13187-13229, 2017.

147
